# Supplementary material for: Oleophobic composite films based on multi-layer graphitic scaffolding
Source: Royal Society of Chemistry journal article supplement (doi:10.1039/d1nj02727a), 2021-01-01
Supplement: d1nj02727a1.pdf [file d1nj02727a1.pdf]

## Electronic Supporting Information for:

# ***Oleophobic Composite Films Based on Multi-Layer Graphitic Scaffolding***

Rachel L. McLaren, Rosenildo C. da Costa, Christian J. Laycock, David J. Morgan, Michael E.A. Warwick and Gareth R. Owen\*

### **Table of Contents**

#### **A. Free-Standing Film Preparation (Page 2)**

**Figure S1** – Photographs of free-standing film preparation: (a) deposition of a dispersion of MLG-PP in methanol into eight sections of a tray; (b) solvent evaporation in air to form films at the bottom of each section and (c) an isolated free-standing film.

#### **B. XPS Analysis (Page 2)**

**Figure S2** - Deconvoluted spectrum of C 1s orbital for MLG-PP composite.

#### **C. Additional SEM Images (Page 3)**

**Figure S3** – SEM images of MLG-PP film at magnifications of (a) 414 x (b) 2.07 kx (c) 4.17 kx (d) 10.45 kx and (e) 34.56 kx.

**Figure S4** – SEM image of MLG-PP film depicting the thickness at a magnification of 198 x.

#### **D. Contact Angle Measurements (Page 4)**

**Figure S5** – Contact angle measurements (°) for silicone oil, hexadecane and Jet A-1 fuel on MLG-PP film with photographs of the droplet in each case.

## A. Free-Standing Film Preparation

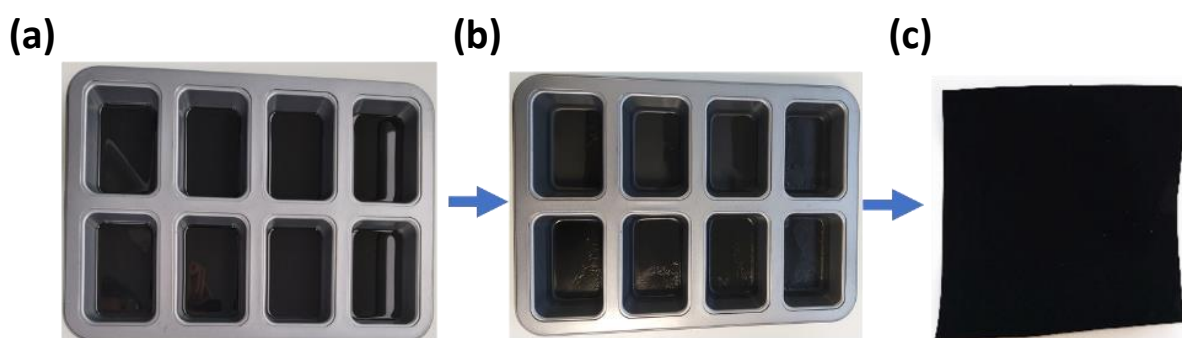

**Figure S1** – Photographs of free-standing film preparation: (a) deposition of a dispersion of MLG-PP in methanol into eight sections of a tray; (b) solvent evaporation in air to form films at the bottom of each section and (c) an isolated free-standing film.

## B. XPS Analysis

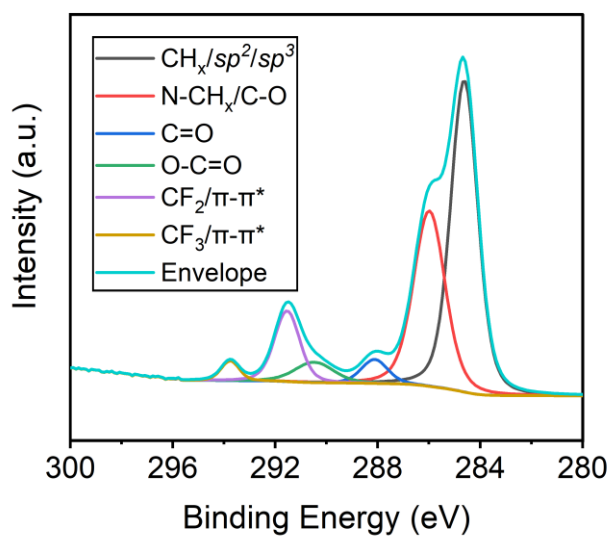

**Figure S2** - Deconvoluted spectrum of C 1s orbital for MLG-PP composite.

## C. Additional SEM Images

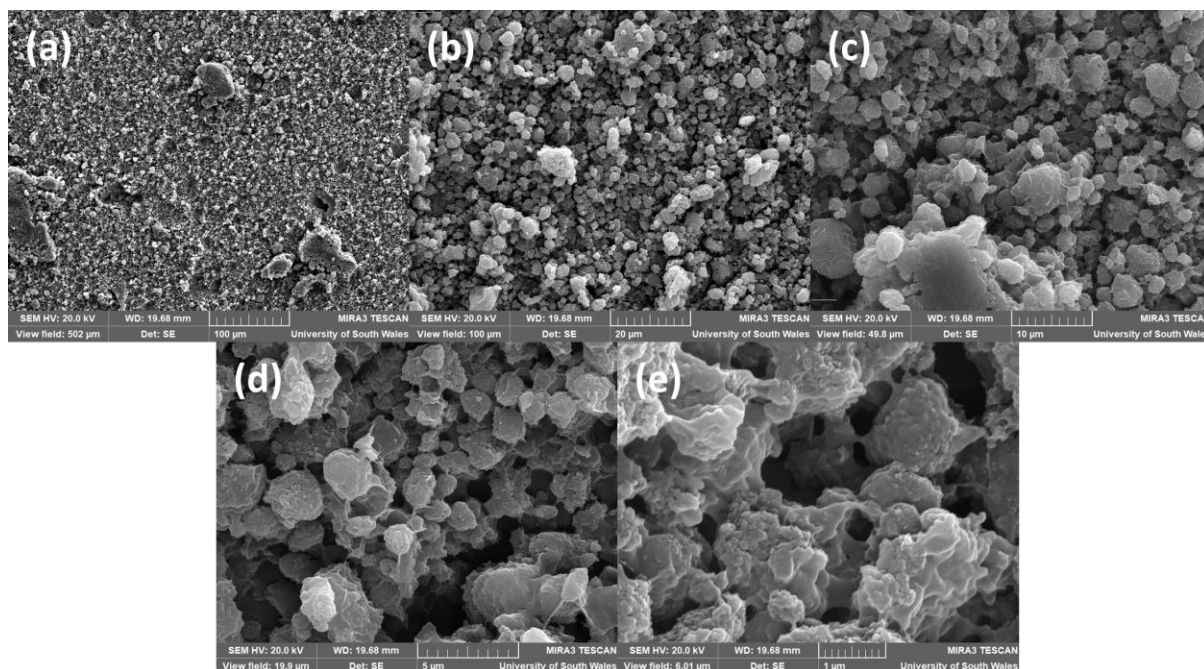

**Figure S3** – SEM images of MLG-PP film at magnifications of (a) 414 x (b) 2.07 kx (c) 4.17 kx (d) 10.45 kx and (e) 34.56 kx.

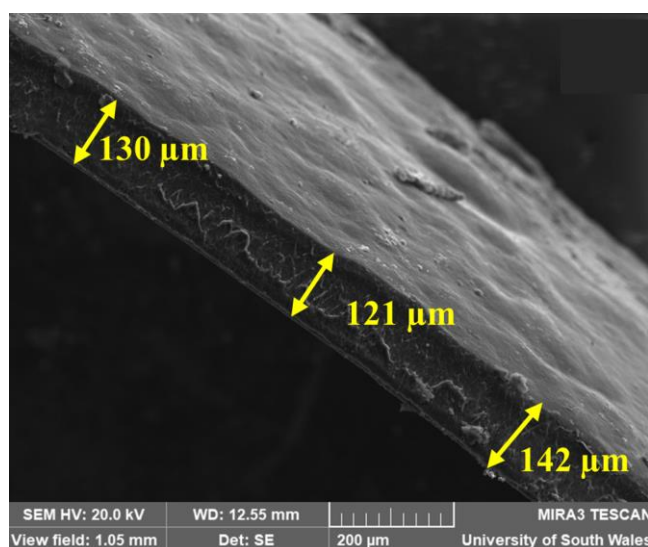

**Figure S4** – SEM image of MLG-PP film depicting the thickness at a magnification of 198 x.

## D. Contact Angle Measurements

| Silicone Oil                                                                               | Hexadecane                                                                                 | Jet A-1 Fuel                                                                                 |
|--------------------------------------------------------------------------------------------|--------------------------------------------------------------------------------------------|----------------------------------------------------------------------------------------------|
| 105.9<br> | 126.4<br> | 111.9<br> |

**Figure S5** – Contact angle measurements (°) for silicone oil, hexadecane and Jet A-1 fuel on MLG-PP film with photographs of the droplet in each case.
